# Supplementary material for: Carbohydrate–aromatic π interactions: a test of density functionals and the DFT-D method
Source: Royal Society of Chemistry journal article supplement (doi:10.1039/b822877a), 2009-01-01
Supplement: b822877a.pdf [file b822877a.pdf]

# **Carbohydrate-aromatic $\pi$ interactions: A test of density functionals and the DFT-D method.**

**Rajesh K Raju, Anitha Ramraj, Ian H Hillier\*, Mark A Vincent and Neil A Burton**

*School of Chemistry, University of Manchester, Oxford Road, Manchester, M13 9PL, UK.*

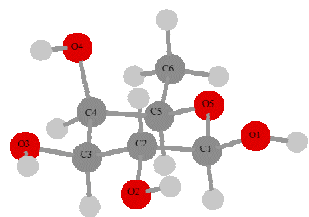

1

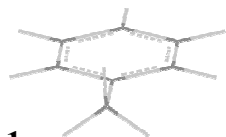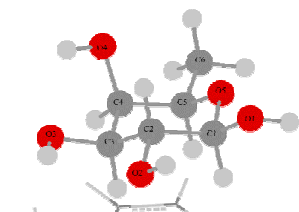

2

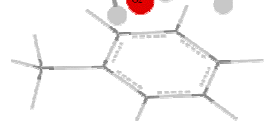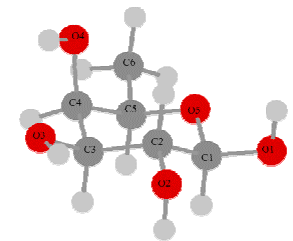

3

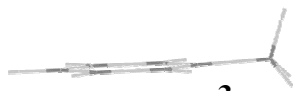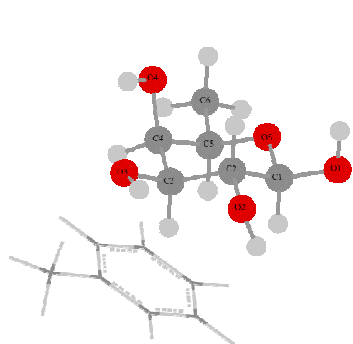

4

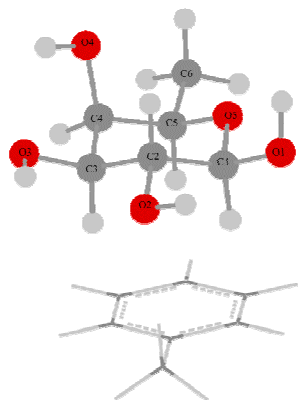

5

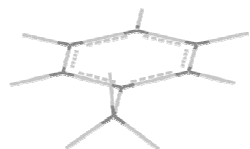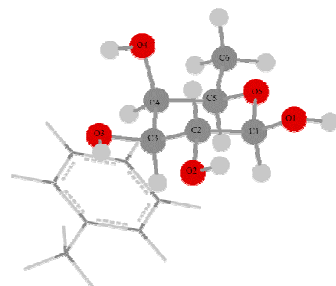

6

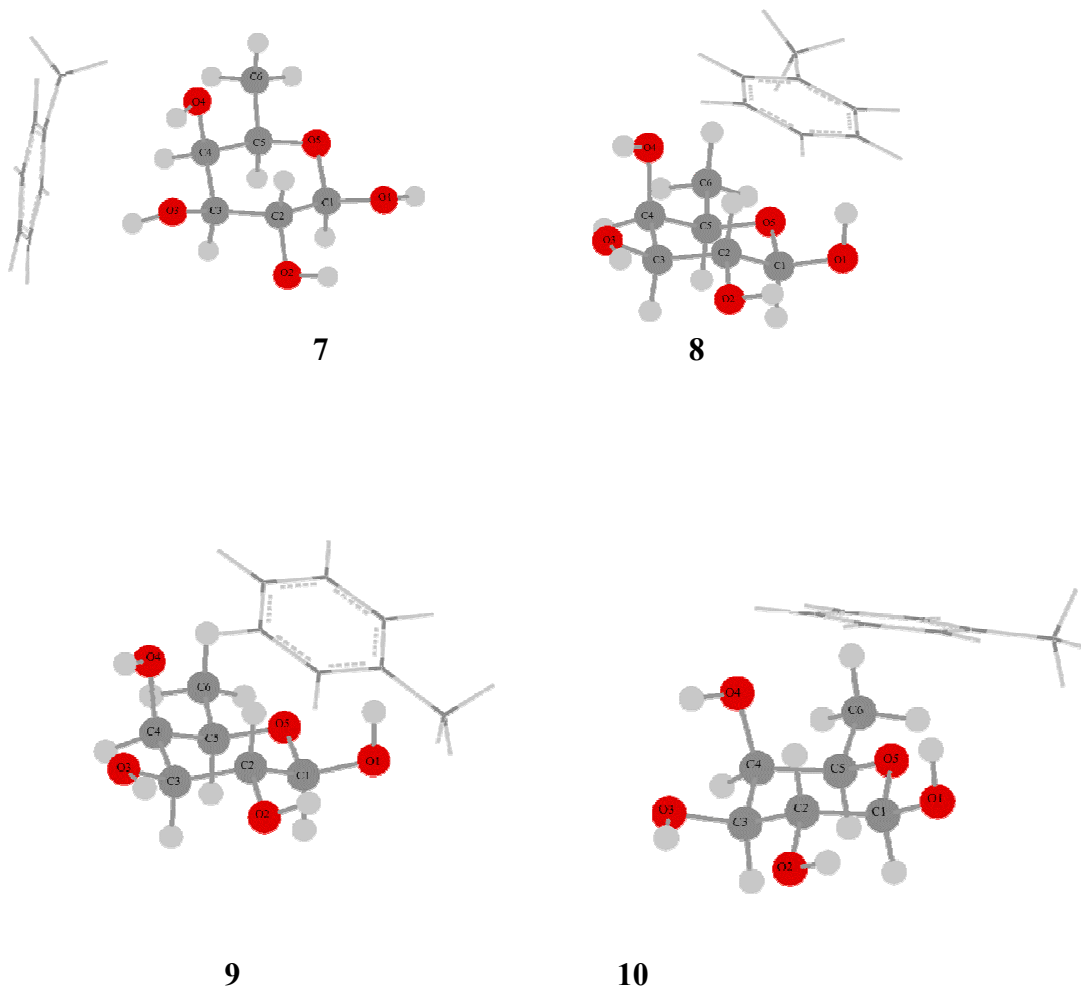

Fig. S1 Optimized structures of fucose-toluene complexes at DFT-D/TZV2D level.

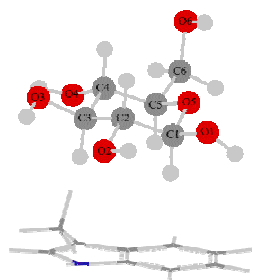

11

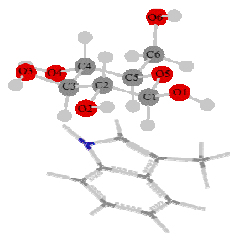

12

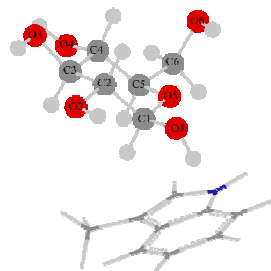

13

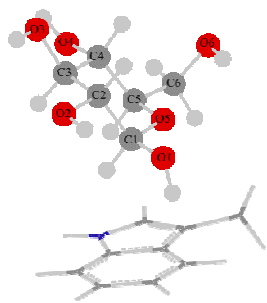

14

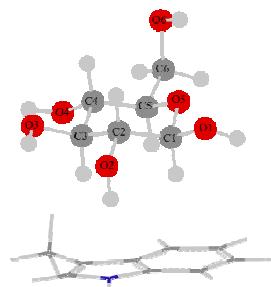

15

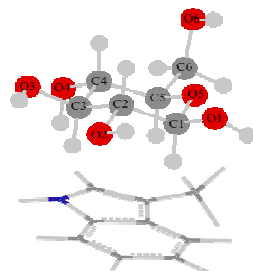

16

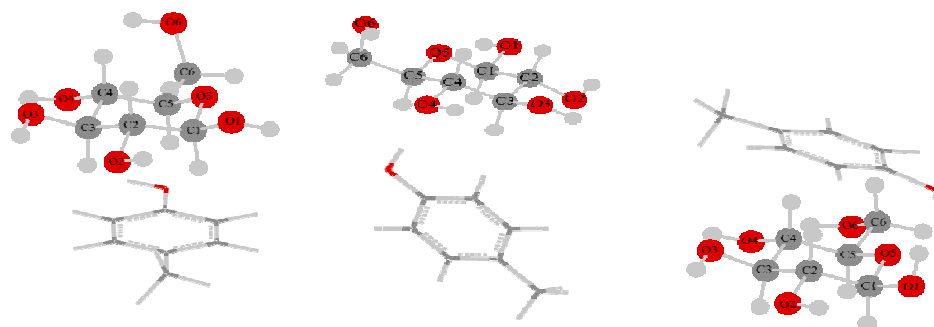

17

18

19

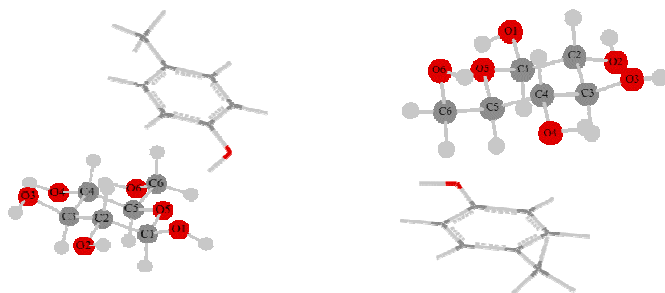

20

21

Fig. S2. Optimized structures of glucose–3-methylindole and –*p*-hydroxytoluene complexes

Table S1.  
Coordinates(Å) of the structures for which 'benchmark'  
calculations were carried out.

Benzene/methane: Fig. 1 (d)

|   |           |           |           |
|---|-----------|-----------|-----------|
| 6 | 1.399758  | 0.026474  | -0.662295 |
| 6 | 0.722814  | -1.199167 | -0.663987 |
| 6 | -0.677088 | -1.225778 | -0.664732 |
| 6 | -1.400043 | -0.026694 | -0.663711 |
| 6 | -0.723116 | 1.198956  | -0.662008 |
| 6 | 0.676781  | 1.225538  | -0.661296 |
| 1 | 2.487162  | 0.047109  | -0.658284 |
| 1 | 1.284404  | -2.130567 | -0.661377 |
| 1 | -1.202916 | -2.177825 | -0.662662 |
| 1 | -2.487452 | -0.047338 | -0.660847 |
| 1 | -1.284708 | 2.130349  | -0.657808 |
| 1 | 1.202607  | 2.177577  | -0.656596 |
| 6 | 0.000351  | 0.000245  | 3.151023  |
| 1 | 0.499619  | 0.906243  | 3.510856  |
| 1 | -1.030012 | -0.017923 | 3.521994  |
| 1 | -0.003354 | -0.006656 | 2.057842  |
| 1 | 0.535194  | -0.880544 | 3.522171  |

Benzene/water: Fig. 1(f)

|   |           |           |           |
|---|-----------|-----------|-----------|
| 6 | 0.713068  | -0.624637 | -1.213395 |
| 6 | 0.469890  | 0.754243  | -1.213340 |
| 6 | 0.349086  | 1.443847  | 0.000334  |
| 6 | 0.468892  | 0.753984  | 1.213942  |
| 6 | 0.712102  | -0.624890 | 1.213874  |
| 6 | 0.835524  | -1.314031 | 0.000209  |
| 1 | 0.803713  | -1.160673 | -2.155057 |
| 1 | 0.371737  | 1.289024  | -2.154966 |
| 1 | 0.162448  | 2.515382  | 0.000378  |
| 1 | 0.369903  | 1.288539  | 2.155604  |
| 1 | 0.802062  | -1.161124 | 2.155495  |
| 1 | 1.026654  | -2.384774 | 0.000167  |
| 8 | -2.682516 | -0.510858 | -0.001195 |
| 1 | -1.953568 | -1.153305 | 0.003795  |
| 1 | -2.215121 | 0.340999  | -0.005846 |

Toluene/Fucose: Fig. 2 (I)

|   |           |           |           |
|---|-----------|-----------|-----------|
| 6 | 0.884848  | -0.476453 | 1.673387  |
| 6 | 0.540867  | -1.330203 | 0.434701  |
| 6 | 1.758637  | -1.468225 | -0.480760 |
| 6 | 2.330062  | -0.088237 | -0.848915 |
| 6 | 2.564808  | 0.735893  | 0.434112  |
| 8 | 1.367575  | 0.813824  | 1.251962  |
| 8 | 0.137457  | -2.672479 | 0.795290  |
| 8 | 1.420887  | -2.142556 | -1.717114 |
| 8 | 1.445496  | 0.617976  | -1.739042 |
| 6 | 3.030414  | 2.164148  | 0.166943  |
| 8 | -0.230976 | -0.288383 | 2.512339  |
| 1 | 1.643868  | -0.985846 | 2.290107  |
| 1 | -0.264603 | -0.825223 | -0.113745 |
| 1 | 2.537706  | -2.041039 | 0.049372  |
| 1 | 3.308280  | -0.236063 | -1.337761 |
| 1 | 3.346275  | 0.204143  | 1.008154  |
| 1 | -0.658426 | -2.592486 | 1.348305  |
| 1 | 0.832595  | -2.879343 | -1.475542 |
| 1 | 1.088547  | -0.062886 | -2.338577 |
| 1 | 3.216715  | 2.679490  | 1.114989  |
| 1 | 3.960405  | 2.148858  | -0.413919 |
| 1 | 2.277216  | 2.718719  | -0.400675 |
| 1 | -0.933854 | 0.136455  | 1.979181  |
| 6 | -3.331721 | -0.111511 | 0.820172  |
| 6 | -2.634620 | 1.103108  | 0.745703  |
| 6 | -3.361882 | -0.972587 | -0.282045 |
| 6 | -1.953506 | 1.481094  | -0.426179 |
| 1 | -2.630317 | 1.773902  | 1.604257  |
| 6 | -2.703084 | -0.600963 | -1.460581 |
| 1 | -3.901930 | -1.914680 | -0.228517 |
| 6 | -2.008529 | 0.611082  | -1.529185 |
| 1 | -3.850539 | -0.379904 | 1.737777  |
| 1 | -2.725733 | -1.259172 | -2.326231 |
| 1 | -1.489079 | 0.884683  | -2.445123 |
| 6 | -1.137989 | 2.751436  | -0.480586 |
| 1 | -0.094429 | 2.524000  | -0.229940 |
| 1 | -1.149636 | 3.191449  | -1.484520 |
| 1 | -1.506399 | 3.496398  | 0.234316  |

Toluene/Fucose: Fig. 2(II)

|   |           |           |           |
|---|-----------|-----------|-----------|
| 6 | 1.084704  | -0.982003 | -1.265212 |
| 6 | 2.087747  | -0.760831 | -0.112747 |
| 6 | 1.487076  | 0.161673  | 0.949229  |
| 6 | 1.013367  | 1.479961  | 0.312960  |
| 6 | 0.085955  | 1.177525  | -0.880007 |
| 8 | 0.711988  | 0.269717  | -1.839152 |
| 8 | 2.428244  | -2.005693 | 0.543451  |
| 8 | 2.446471  | 0.496401  | 1.982244  |
| 8 | 2.129849  | 2.283622  | -0.111777 |
| 6 | -0.344899 | 2.418179  | -1.652524 |
| 8 | 1.643406  | -1.793088 | -2.288935 |
| 1 | 0.203206  | -1.530924 | -0.900725 |
| 1 | 2.990155  | -0.288601 | -0.532682 |
| 1 | 0.618063  | -0.337250 | 1.402484  |
| 1 | 0.417916  | 2.029139  | 1.062047  |
| 1 | -0.803386 | 0.679880  | -0.469061 |
| 1 | 2.745392  | -2.613521 | -0.147057 |
| 1 | 2.909691  | -0.326978 | 2.213661  |
| 1 | 2.783034  | 2.224220  | 0.608801  |
| 1 | -1.048266 | 2.137785  | -2.443711 |
| 1 | -0.844217 | 3.119612  | -0.973575 |
| 1 | 0.520155  | 2.918722  | -2.098126 |
| 1 | 2.295420  | -1.240126 | -2.758666 |
| 6 | -2.154372 | -0.577130 | 1.901903  |
| 6 | -2.925240 | 0.502865  | 1.457224  |
| 6 | -3.504391 | 0.476856  | 0.183223  |
| 6 | -3.303408 | -0.636865 | -0.640058 |
| 6 | -2.530660 | -1.713370 | -0.190745 |
| 6 | -1.943795 | -1.703478 | 1.087005  |
| 1 | -2.382345 | -2.574786 | -0.839980 |
| 1 | -3.746231 | -0.668001 | -1.632806 |
| 1 | -4.104435 | 1.314341  | -0.163812 |
| 1 | -3.075632 | 1.362260  | 2.106776  |
| 1 | -1.712694 | -0.547681 | 2.896809  |
| 6 | -1.080902 | -2.855661 | 1.556796  |
| 1 | -0.030345 | -2.706227 | 1.268669  |
| 1 | -1.109610 | -2.954961 | 2.648381  |
| 1 | -1.409748 | -3.804129 | 1.115687  |



## Galactose/benzene: Fig. 2(III)

|   |           |           |           |
|---|-----------|-----------|-----------|
| 6 | 1.457417  | -1.081628 | -1.059072 |
| 6 | 2.245253  | -0.620086 | 0.178196  |
| 6 | 1.324907  | 0.199458  | 1.086407  |
| 6 | 0.667236  | 1.361830  | 0.325919  |
| 6 | 0.028465  | 0.849023  | -0.976231 |
| 8 | 0.956746  | 0.058511  | -1.770125 |
| 8 | 2.726457  | -1.729985 | 0.972344  |
| 8 | 2.044089  | 0.769419  | 2.205826  |
| 8 | 1.617101  | 2.408969  | 0.025735  |
| 6 | -0.445182 | 1.979130  | -1.911645 |
| 8 | 2.355372  | -1.778944 | -1.901263 |
| 1 | 0.612784  | -1.728493 | -0.752890 |
| 1 | 3.080713  | 0.006079  | -0.167659 |
| 1 | 0.526298  | -0.461077 | 1.458229  |
| 1 | -0.140216 | 1.765424  | 0.954425  |
| 1 | -0.827389 | 0.222618  | -0.691116 |
| 1 | 3.346134  | -2.234330 | 0.418841  |
| 1 | 2.639030  | 0.073938  | 2.536362  |
| 1 | 2.166856  | 2.499981  | 0.825406  |
| 1 | 0.432037  | 2.413362  | -2.408775 |
| 1 | -1.104682 | 1.555036  | -2.675388 |
| 1 | 1.850639  | -2.154809 | -2.642247 |
| 6 | -2.402927 | -0.071098 | 1.811184  |
| 6 | -3.052359 | 0.858826  | 0.991212  |
| 6 | -3.566607 | 0.461131  | -0.248680 |
| 6 | -3.431412 | -0.867549 | -0.668356 |
| 6 | -2.775346 | -1.797775 | 0.148926  |
| 6 | -2.261116 | -1.399404 | 1.389005  |
| 1 | -1.749847 | -2.120238 | 2.023004  |
| 1 | -2.666467 | -2.829172 | -0.178844 |
| 1 | -3.828560 | -1.176314 | -1.632645 |
| 1 | -4.052380 | 1.191067  | -0.890641 |
| 1 | -3.141613 | 1.895461  | 1.304429  |
| 1 | -1.997105 | 0.239505  | 2.771226  |
| 8 | -1.215675 | 2.986800  | -1.226669 |
| 1 | -0.583095 | 3.540472  | -0.737572 |

*p*-hydroxy-toluene/glucose: Fig. 2 (IV)

|   |           |           |           |
|---|-----------|-----------|-----------|
| 6 | -2.227820 | -1.490429 | -0.271481 |
| 6 | -1.494523 | -0.622596 | 0.730829  |
| 6 | -0.291335 | -1.055927 | 1.313259  |
| 6 | -1.962859 | 0.652948  | 1.088272  |
| 6 | 0.428809  | -0.247499 | 2.195426  |
| 6 | -1.260304 | 1.474775  | 1.975209  |
| 6 | -0.051244 | 1.028390  | 2.523308  |
| 8 | 0.633309  | 1.893583  | 3.359805  |
| 6 | -0.081128 | 1.112162  | -2.456708 |
| 6 | 0.900017  | -0.007169 | -2.849784 |
| 6 | 1.817424  | -0.348049 | -1.669913 |
| 6 | 2.458342  | 0.921028  | -1.101296 |
| 6 | 1.363334  | 1.943502  | -0.747156 |
| 6 | 1.900033  | 3.236996  | -0.122262 |
| 8 | 0.208292  | -1.228145 | -3.209809 |
| 8 | 2.895688  | -1.234736 | -2.057218 |
| 8 | 3.230569  | 0.641212  | 0.092199  |
| 8 | 0.632768  | 2.258846  | -1.965250 |
| 8 | 3.053196  | 3.797809  | -0.779817 |
| 1 | 1.510082  | 0.354435  | -3.691477 |
| 1 | -0.331318 | -1.032981 | -3.994618 |
| 1 | 1.216880  | -0.820884 | -0.878584 |
| 1 | 2.489488  | -2.039992 | -2.420072 |
| 1 | 3.109507  | 1.364075  | -1.870176 |
| 1 | 3.802858  | -0.114641 | -0.128073 |
| 1 | -0.771817 | 0.750595  | -1.674113 |
| 1 | 0.670659  | 1.495950  | -0.020862 |
| 1 | 1.114081  | 3.997452  | -0.181949 |
| 1 | 2.107176  | 3.041068  | 0.939263  |
| 1 | 3.820886  | 3.261415  | -0.520594 |
| 1 | -1.669855 | -1.557340 | -1.216532 |
| 1 | -3.222062 | -1.086415 | -0.495155 |
| 1 | -2.355757 | -2.513928 | 0.104289  |
| 1 | -2.896527 | 1.018004  | 0.663284  |
| 1 | -1.632510 | 2.462840  | 2.233448  |
| 1 | 1.376138  | -0.597285 | 2.602350  |
| 1 | 0.102062  | -2.039841 | 1.062967  |
| 1 | 1.470594  | 1.477178  | 3.625261  |
| 8 | -0.785321 | 1.484291  | -3.626561 |
| 1 | -1.474114 | 2.123473  | -3.376829 |

Toluene/alpha-methyl-glucose: Fig. 2 (V)

|   |           |           |           |
|---|-----------|-----------|-----------|
| 6 | 4.901750  | 1.044361  | 0.468100  |
| 6 | 4.422371  | 0.516326  | -0.744086 |
| 6 | 3.989860  | 1.416985  | -1.732990 |
| 6 | 4.025566  | 2.798412  | -1.517134 |
| 6 | 4.499646  | 3.309763  | -0.302720 |
| 6 | 4.938873  | 2.425387  | 0.690323  |
| 6 | 4.320468  | -0.977731 | -0.962768 |
| 8 | 0.785875  | -1.791609 | 0.107180  |
| 6 | 0.155667  | -0.534962 | 0.444098  |
| 6 | -0.718847 | -0.102292 | -0.744131 |
| 8 | -1.333258 | 1.193005  | -0.448030 |
| 6 | -0.398347 | 2.257752  | -0.220970 |
| 6 | 0.530884  | 1.916399  | 0.964373  |
| 6 | 1.199878  | 0.547293  | 0.737580  |
| 6 | -1.877290 | -1.055426 | -1.032659 |
| 8 | -2.649736 | -0.640573 | -2.175357 |
| 8 | 0.426318  | 2.531597  | -1.348945 |
| 6 | -0.293793 | 3.035021  | -2.492329 |
| 8 | 1.493569  | 2.948737  | 1.231551  |
| 8 | 1.948602  | 0.113845  | 1.894613  |
| 1 | -2.976614 | 0.253771  | -1.977649 |
| 1 | -2.512616 | -1.140340 | -0.135156 |
| 1 | -1.476256 | -2.044222 | -1.271623 |
| 1 | -0.095260 | -0.013206 | -1.644611 |
| 1 | -0.485058 | -0.664227 | 1.333009  |
| 1 | 1.442921  | -1.957921 | 0.805835  |
| 1 | 1.870656  | 0.622370  | -0.129293 |
| 1 | 2.651775  | 0.771773  | 2.036066  |
| 1 | 2.029261  | 3.071083  | 0.425000  |
| 1 | -0.091467 | 1.861299  | 1.864774  |
| 1 | -1.027853 | 3.129496  | 0.011319  |
| 1 | -0.873417 | 3.932552  | -2.224889 |
| 1 | 0.460749  | 3.296138  | -3.239415 |
| 1 | -0.970326 | 2.273167  | -2.901776 |
| 1 | 3.284126  | -1.316582 | -0.822076 |
| 1 | 4.617931  | -1.252963 | -1.982122 |
| 1 | 4.952366  | -1.529682 | -0.257738 |
| 1 | 3.610947  | 1.031153  | -2.677737 |

|   |          |          |           |
|---|----------|----------|-----------|
| 1 | 3.679814 | 3.475336 | -2.294660 |
| 1 | 4.528434 | 4.383113 | -0.132064 |
| 1 | 5.309796 | 2.811786 | 1.636765  |
| 1 | 5.247740 | 0.364567 | 1.245175  |

Table S2. Interaction energies (kcal mol<sup>-1</sup>) for full dataset, for 18 functionals, DFT-D and MP2, the MUE values compared to the DFT-D values are also given.

| Complex                                  | DFT-D  | BLYP  | B3LYP | B97-2 | B98   | BMK   | BH&H   | BH&HLYP | PBE   | VSXC   |
|------------------------------------------|--------|-------|-------|-------|-------|-------|--------|---------|-------|--------|
| <b>1</b>                                 | -6.25  | 2.26  | 0.71  | 0.75  | -1.12 | -2.23 | -7.43  | -0.64   | -1.42 | -26.84 |
| <b>2</b>                                 | -6.18  | 2.46  | 0.87  | 0.94  | -0.97 | -2.30 | -7.34  | -0.54   | -1.19 | -27.79 |
| <b>3</b>                                 | -8.11  | -0.65 | -2.12 | -1.99 | -3.77 | -4.34 | -10.04 | -3.38   | -4.12 | -23.52 |
| <b>4</b>                                 | -6.19  | 2.41  | 0.82  | 0.88  | -1.02 | -2.34 | -7.36  | -0.58   | -1.24 | -27.88 |
| <b>5 (II)</b>                            | -6.52  | 2.09  | 0.55  | 0.61  | -1.28 | -2.37 | -7.65  | -0.80   | -1.61 | -27.02 |
| <b>6</b>                                 | -5.92  | 2.08  | 0.68  | 0.84  | -1.02 | -1.95 | -6.93  | -0.55   | -1.29 | -24.63 |
| <b>7</b>                                 | -7.79  | -0.57 | -1.95 | -1.72 | -3.54 | -4.42 | -9.84  | -3.19   | -4.00 | -25.73 |
| <b>8 (I)</b>                             | -9.28  | -0.36 | -1.92 | -1.58 | -3.78 | -4.59 | -11.05 | -3.28   | -4.33 | -31.88 |
| <b>9</b>                                 | -7.84  | 0.18  | -1.22 | -1.08 | -2.93 | -3.63 | -9.28  | -2.41   | -3.45 | -27.16 |
| <b>10</b>                                | -7.58  | -0.76 | -2.10 | -1.95 | -3.61 | -3.65 | -9.53  | -3.28   | -4.05 | -20.57 |
| $\alpha$ -methyl-glucose -<br>toluene(V) | -7.97  | 0.44  | -0.87 | -0.61 | -2.65 | -3.16 | -9.04  | -1.98   | -3.28 | -28.10 |
| Galactose-benzene<br>(III)               | -5.14  | 2.07  | 0.67  | 0.61  | -0.99 | -1.72 | -6.27  | -0.57   | -1.12 | -23.42 |
| Benzene-H <sub>2</sub> O                 | -3.77  | -1.33 | -1.91 | -1.85 | -2.70 | -2.56 | -5.44  | -2.44   | -2.96 | -10.26 |
| Benzene-CH <sub>4</sub>                  | -0.97  | 0.93  | 0.44  | 0.36  | -0.28 | 0.21  | -1.98  | 0.02    | -0.32 | -5.28  |
| <b>11</b>                                | -9.78  | 0.79  | -1.01 | -0.82 | -3.12 | -4.41 | -10.94 | -2.61   | -3.57 | -36.28 |
| <b>12</b>                                | -10.55 | -1.44 | -3.14 | -2.74 | -4.85 | -6.05 | -12.52 | -4.66   | -5.29 | -30.05 |
| <b>13</b>                                | -10.20 | -0.66 | -2.20 | -1.88 | -4.02 | -4.97 | -11.16 | -3.49   | -4.56 | -28.60 |
| <b>14</b>                                | -10.33 | 0.07  | -1.82 | -1.46 | -3.76 | -5.25 | -11.69 | -3.32   | -4.31 | -32.62 |
| <b>15</b>                                | -11.46 | -0.49 | -2.60 | -2.30 | -4.69 | -6.54 | -13.71 | -4.51   | -5.09 | -36.31 |
| <b>16</b>                                | -9.96  | 0.08  | -1.84 | -1.60 | -3.81 | -4.98 | -11.70 | -3.54   | -4.04 | -30.43 |
| <b>17 (IV)</b>                           | -7.27  | 1.91  | 0.35  | 0.48  | -1.58 | -2.35 | -8.23  | -1.01   | -2.00 | -29.35 |
| <b>18</b>                                | -10.56 | -4.36 | -5.51 | -4.81 | -6.49 | -6.96 | -13.15 | -6.55   | -7.29 | -21.19 |
| <b>19</b>                                | -9.77  | -0.57 | -2.20 | -2.38 | -3.91 | -4.84 | -11.61 | -3.66   | -4.42 | -30.24 |
| <b>20</b>                                | -9.04  | -0.65 | -2.02 | -1.41 | -3.56 | -4.83 | -10.64 | -3.29   | -4.17 | -29.06 |
| <b>21</b>                                | -7.16  | 1.40  | -0.14 | -0.04 | -1.95 | -2.43 | -8.18  | -1.50   | -2.32 | -26.81 |
| MUE                                      |        | 8.12  | 6.64  | 6.83  | 4.97  | 4.12  | 1.48   | 5.35    | 4.57  | 18.62  |

| Complex                                  | MPW1B95 | MPWB1K | PWB6K | PW6B95 | MP2    | M05   | M05-2X | M06    | M06-L  |
|------------------------------------------|---------|--------|-------|--------|--------|-------|--------|--------|--------|
| <b>1</b>                                 | -2.87   | -3.29  | -4.30 | -3.21  | -8.71  | -2.83 | -5.30  | -6.08  | -5.94  |
| <b>2</b>                                 | -2.89   | -3.33  | -4.36 | -3.25  | -8.61  | -2.84 | -5.27  | -6.06  | -5.74  |
| <b>3</b>                                 | -4.48   | -4.88  | -5.86 | -4.78  | -10.35 | -5.32 | -7.50  | -7.98  | -7.22  |
| <b>4</b>                                 | -2.92   | -3.37  | -4.38 | -3.28  | -8.66  | -2.89 | -5.32  | -6.12  | -5.79  |
| <b>5 (II)</b>                            | -2.99   | -3.41  | -4.41 | -3.33  | -8.94  | -2.99 | -5.46  | -6.26  | -6.06  |
| <b>6</b>                                 | -2.46   | -2.83  | -3.83 | -2.83  | -8.08  | -2.84 | -4.78  | -5.42  | -5.09  |
| <b>7</b>                                 | -4.94   | -5.30  | -6.25 | -5.25  | -9.80  | -5.24 | -7.46  | -7.70  | -7.30  |
| <b>8 (I)</b>                             | -5.09   | -5.46  | -6.62 | -5.51  | -11.61 | -5.81 | -8.23  | -9.21  | -8.72  |
| <b>9</b>                                 | -4.36   | -4.70  | -5.68 | -4.70  | -10.06 | -4.67 | -7.13  | -7.72  | -7.45  |
| <b>10</b>                                | -4.36   | -4.72  | -5.70 | -4.67  | -9.71  | -5.04 | -7.09  | -6.97  | -6.63  |
| $\alpha$ -methyl-glucose -<br>toluene(V) | -3.77   | -4.04  | -5.17 | -4.24  | -10.02 | -4.53 | -6.64  | -7.41  | -7.11  |
| Galactose-benzene<br>(III)               | -2.59   | -2.97  | -3.89 | -2.93  | -7.73  | -2.55 | -4.77  | -5.21  | -5.14  |
| Benzene-H <sub>2</sub> O                 | -3.26   | -3.38  | -3.90 | -3.44  | -4.18  | -3.41 | -4.18  | -3.56  | -3.29  |
| Benzene-CH <sub>4</sub>                  | -0.52   | -0.64  | -1.10 | -0.72  | -1.87  | -0.81 | -1.19  | -0.91  | -0.80  |
| <b>11</b>                                | -5.03   | -5.50  | -6.72 | -5.47  | -13.65 | -5.35 | -8.52  | -9.45  | -9.08  |
| <b>12</b>                                | -6.18   | -6.67  | -7.79 | -6.54  | -13.98 | -6.74 | -9.42  | -10.21 | -9.68  |
| <b>13</b>                                | -5.24   | -5.60  | -6.74 | -5.66  | -13.05 | -5.99 | -8.49  | -8.86  | -8.42  |
| <b>14</b>                                | -5.53   | -5.97  | -7.15 | -5.94  | -13.37 | -5.86 | -8.80  | -9.28  | -8.78  |
| <b>15</b>                                | -6.53   | -7.17  | -8.38 | -6.86  | -15.70 | -6.75 | -10.42 | -11.19 | -10.43 |
| <b>16</b>                                | -4.87   | -5.44  | -6.65 | -5.27  | -13.83 | -5.81 | -8.73  | -9.66  | -8.76  |
| <b>17 (IV)</b>                           | -3.08   | -3.47  | -4.61 | -3.52  | -9.98  | -3.48 | -5.96  | -6.79  | -6.55  |
| <b>18</b>                                | -7.40   | -7.68  | -8.54 | -7.64  | -11.17 | -7.81 | -9.15  | -9.39  | -9.43  |
| <b>19</b>                                | -5.26   | -5.67  | -6.88 | -5.70  | -12.44 | -5.94 | -8.37  | -9.23  | -8.95  |
| <b>20</b>                                | -5.14   | -5.47  | -6.59 | -5.57  | -11.00 | -5.46 | -7.51  | -8.40  | -8.47  |
| <b>21</b>                                | -3.24   | -3.65  | -4.76 | -3.66  | -10.00 | -3.70 | -6.14  | -6.72  | -6.54  |
| MUE                                      | 3.62    | 3.24   | 2.23  | 3.26   | 2.44   | 3.24  | 1.00   | 0.40   | 0.73   |
